# Supplementary material for: High-frequency synthetic apomixis in hybrid rice
Source: Springer Nature journal article supplement (doi:10.1038/s41467-022-35679-3), 2022-12-27
Supplement: MOESM1 [file 41467_2022_35679_MOESM1_ESM.pdf]

# **High-frequency synthetic apomixis in hybrid rice**

Vernet *et al.*

**Supplementary Table 1. Transformation efficiency in BRS-CIRAD 302.**

| <b>T-DNA constructs</b>                | <b>Co-cultivated calli</b> | <b>Number of HygR cell lines / co-cultivated callus</b> | <b>Resistant cell lines</b> | <b>Regeneration frequency</b> | <b>T0 plants</b> |
|----------------------------------------|----------------------------|---------------------------------------------------------|-----------------------------|-------------------------------|------------------|
| <b>T313 : sgMiMe</b>                   | 22                         | 3.9 +/- 3.8                                             | 85                          | 57.9                          | 41               |
| <b>T314 : sg MiMe<br/>_pAtECS:BBM1</b> | 16                         | 2.2 +/- 1                                               | 37                          | 70.3                          | 49               |
|                                        | 32                         | 4.9 +/- 3.9                                             | 157                         | 73.8                          |                  |
| <b>T315 : sgMiMe<br/>_pOsECS:BBM1</b>  | 25                         | 3.7 +/- 3.7                                             | 95                          | 61.0                          | 88               |
|                                        | 38                         | 7.9 +/- 7.3                                             | 286                         | 56.2                          |                  |

Mature seed embryo-derived embryogenic calluses were co-cultivated with *Agrobacterium* EHA105 suspensions carrying either the sgMiMe (T313), the sgMiMe\_pAtECS:BBM1 (T314) or the sgMiMe\_pOsECS:BBM1 (T315) binary plasmid. Several hygromycin-resistant cell lines were formed per co-cultivated callus. The total number of hygromycin-resistant cell lines is shown: Only a sub-fraction of these lines was tested for regeneration. The number of T0 plants refers to the number of confirmed primary transformants transferred to the greenhouse.

**Supplementary Table 2. *OsOSD1* editing efficiencies in primary (T0) transformants of BRS-CIRAD 302.**

| T-DNA constructs                   | Biallelic | Homozygous | Monoallelic | WT | Total plants | Edited in <i>OsOSD1</i> | Editing efficiency (%) | Number of fertile T0 plants | Fertile plants (%) |
|------------------------------------|-----------|------------|-------------|----|--------------|-------------------------|------------------------|-----------------------------|--------------------|
| <b>T313 : sgMiMe</b>               | 21        | 14         | 1           | 5  | 41           | 35                      | 85.4                   | 20                          | 49                 |
| <b>T314 : sg MiMe _pAtECS:BBM1</b> | 27        | 13         | 0           | 9  | 49           | 40                      | 81.6                   | 33                          | 67                 |
| <b>T315 : sgMiMe _pOsECS:BBM1</b>  | 42        | 22         | 5           | 19 | 88           | 64                      | 72.7                   | 36                          | 41                 |
| <b>Total</b>                       |           |            |             |    | 178          | 139                     | 78.1                   | 89                          | 50                 |

T0 plants harbored either the sgMiMe (T313), the sgMiMe\_pAtOCS:BBM1 (T314) or the sgMiMe\_pOsECS:BBM1 (T315) T-DNA. The lesions observed can be homozygous (same alteration at the two alleles, biallelic (two distinct alterations at the two alleles) or heterozygous (or monoallelic: one allele altered, the other being wild-type (WT))). The number and frequency of fertile plants for each T-DNA construct is shown. The distribution of number of T1 seeds per fertile event is shown in Supplementary Figure 1.

**Supplementary Table 3. Lesions observed at CRISPR target regions (red) in *OsOSD1*, *PAIR1* and *OsREC8* coding sequences in fertile BRS-CIRAD 302 primary (T0) transformation events.**

| T0 Events                |           | Number of T-DNA copies | <i>Os OSD1</i>                                              | <i>PAIR1</i>                                                        | <i>Os REC8</i>                                                  | T1 seeds |
|--------------------------|-----------|------------------------|-------------------------------------------------------------|---------------------------------------------------------------------|-----------------------------------------------------------------|----------|
|                          |           |                        | GTGAGAAATTCGGCGGTAGGGCGGCGCTCGCCGA<br>CCCCCTGGGTGGTGGGTCTTT | CGCAGTCGCAGTTCTCGCAGGTCTCCCTCGACGACAACCTC<br>CTCACCCCTCCTCCCTTCCCCC | CGTGGGAGTGTGATAGGTGGTGTGGCGATCGTGTACGA<br>GAGGAAGGTGAAGGCTCTGTA |          |
| T313: sgMiMe             | T313 4.3  | > 2                    | Homozygous (+T)                                             | Biallelic (+T/+A)                                                   | Biallelic (+1/-6)                                               | 127      |
|                          | T313 9.1  | 1                      | Biallelic (+T/+A)                                           | Biallelic (-2/+1)                                                   | Homozygous (-C)                                                 | 164      |
|                          | T313 12.2 | > 2                    | Biallelic (+1/-5)                                           | Homozygous (+A)                                                     | Biallelic (-3+1)                                                | 227      |
|                          | T313 21   | 2                      | Biallelic (-47+46/+1)                                       | Biallelic (+T/+A)                                                   | Biallelic (+1/-5+1)                                             | 168      |
|                          | T313 22.1 | 1                      | WT                                                          | WT                                                                  | WT                                                              | 150      |
|                          | T313 22.2 | 1                      | WT                                                          | WT                                                                  | WT                                                              | 200      |
| T314: sgMiMe_pAtECS:BBM1 | T314 3.1  | 1                      | WT                                                          | WT                                                                  | WT                                                              | 59       |
|                          | T314 12.2 | 2                      | Biallelic (-1/+1)                                           | Biallelic (+T/+A)                                                   | Homozygous (+G)                                                 | 68       |
|                          | T314 12.3 | 1                      | WT                                                          | WT                                                                  | WT                                                              | 664      |
|                          | T314 15.1 | > 2                    | Biallelic (+T/+AG)                                          | Homozygous (+A)                                                     | Homozygous (-5+1)                                               | 182      |
|                          | T314 15.3 | > 2                    | He (WT/+2)                                                  | Homozygous (+A)                                                     | Homozygous (-4)                                                 | 136      |
|                          | T314 16   | 2                      | Biallelic (+1/-8+3)                                         | Homozygous (+A)                                                     | Biallelic (-3+G/-2+G)                                           | 91       |
|                          | T314 23.1 | 1                      | Biallelic (+2/+1)                                           | Biallelic (+G/+A)                                                   | Biallelic (+1/-24)                                              | 31       |
|                          | T314 37.7 | 2                      | Biallelic (+1/-5)                                           | Homozygous (+T)                                                     | Biallelic (-3/+G)                                               | 82       |
|                          | T314 37.9 | 1                      | Homozygous (-7)                                             | Biallelic (-2/+1)                                                   | Biallelic (-6/-17)                                              | 14       |
|                          | T314 44.1 | 2                      | Biallelic (-7/+1)                                           | Homozygous (+A)                                                     | Biallelic (+1/-2+1)                                             | 15       |
|                          | T314 44.2 | 2                      | Biallelic (-7/+1)                                           | Homozygous (+A)                                                     | Biallelic (+1/-6+1)                                             | 33       |
|                          | T314 46.2 | 1                      | Biallelic (-7/+1)                                           | Homozygous (+A)                                                     | Biallelic (+1/-5+1)                                             | 52       |
| T315: sgMiMe_pOsECS:BBM1 | T315 1.1  | > 2                    | Homozygous (+2)                                             | Biallelic (-2/+1)                                                   | Biallelic (+1/-5+1)                                             | 14       |
|                          | T315 3.2  | 1                      | Biallelic (-22/-34+4)                                       | Homozygous (-28)                                                    | Biallelic (-3/-4)                                               | 141      |
|                          | T315 3.3  | 1                      | Biallelic (-4/-22)                                          | Homozygous (+T)                                                     | Biallelic (-26/+1)                                              | 182      |
|                          | T315 5.1  | > 2                    | Homozygous (indel: TA/AG -19)                               | Biallelic (+1/-3)                                                   | Homozygous (-5+1)                                               | 14       |
|                          | T315 5.4  | 1                      | Biallelic (+T/+A)                                           | Biallelic (+G/+T)                                                   | Biallelic (+1/-5)                                               | 114      |
|                          | T315 5.5  | 1                      | Biallelic (+T/-22)                                          | Biallelic (+G/+T)                                                   | Biallelic (+1/-6+1)                                             | 64       |
|                          | T315 6.1  | 2                      | Biallelic (+1/-1)                                           | Heterozygous (WT/-12)                                               | Heterozygous (WT/-35)                                           | 86       |
|                          | T315 7.2  | 2                      | Biallelic (-19/+14/del)                                     | Biallelic (+C/+A)                                                   | Biallelic (-24/+1)                                              | 150      |
|                          | T315 7.4  | > 2                    | Biallelic (-19+14/-21+90)                                   | Biallelic (+C/+A)                                                   | Biallelic (-4/-24)                                              | 73       |
|                          | T315 8.1  | 1                      | Homozygous (-5)                                             | Homozygous (+G)                                                     | Homozygous (+C)                                                 | 264      |
|                          | T315 8.2  | 1                      | Biallelic (-5/+A)                                           | Homozygous (+G)                                                     | Homozygous (+C)                                                 | 195      |
|                          | T315 8.3  | 1                      | Biallelic (-5/+A)                                           | Homozygous (+G)                                                     | Homozygous (+C)                                                 | 123      |
|                          | T315 14.1 | 1                      | WT                                                          | WT                                                                  | WT                                                              | 9        |
|                          | T315 14.2 | 1                      | WT                                                          | WT                                                                  | WT                                                              | 23       |
|                          | T315 14.3 | 1                      | WT                                                          | WT                                                                  | WT                                                              | 73       |
|                          | T315 16.1 | > 2                    | Biallelic (+1/-2)                                           | Biallelic (-A/+A)                                                   | Biallelic (-15/-5)                                              | 18       |
|                          | T315 16.3 | 2                      | Homozygous (+1)                                             | Biallelic (+T/+A)                                                   | Biallelic (-2/-4)                                               | 14       |
|                          | T315 21.1 | 1                      | WT                                                          | WT                                                                  | WT                                                              | 55       |
|                          | T315 24.1 | > 2                    | Homozygous (-29)                                            | Biallelic (-2/+1)                                                   | Biallelic (-4/-4+1)                                             | 50       |
|                          | T315 31.1 | > 2                    | Biallelic (-39+2/-7)                                        | Homozygous (-A)                                                     | Biallelic (-6/-6+3)                                             | 24       |
|                          | T315 31.4 | 1                      | Biallelic (-2/+1)                                           | Biallelic (+1/-7)                                                   | Biallelic (+1/-24)                                              | 36       |
|                          | T315 41.2 | 1                      | Biallelic (+T/+A)                                           | Biallelic (+1/-4/+3)                                                | Biallelic (-5/-5+1)                                             | 30       |
|                          | T315 41.6 | > 2                    | Homozygous (+1)                                             | Biallelic (+T/+A)                                                   | Biallelic (-4+1)                                                | 25       |

T0 events harbored the sgMiMe (T313), the sgMiMe\_pAtECS:BBM1 (T314) or the sgMiMe\_pOsECS:BBM1 (T315) T-DNAs. Homozygous and biallelic lesions are highlighted by different green background colors. Alleles exhibiting inserted or deleted nucleotides that diverge from a multiple of three are indicative of frameshift mutations and are likely inactivated. Wild-type (WT) or heterozygous target regions appear on an orange background. The number of seeds harvested from T0 plants is shown. For T313, only the six T0 events exhibiting the highest number of T1 seeds were analyzed. For T314 and T315 only the T0 events showing more than nine T1 seeds were analyzed. The T314 15.3 line is heterozygous at the *OsOSD1* locus and homozygous mutant at *PAIR1* and *OsREC8*. Such a mutation configuration should lead to plant sterility. However, sequencing of T1 progeny plants proved that a late mutation (-31 nt deletion + 3nt insertion) eventually occurred in the primary transformant, altering the remaining intact allele of *OsOSD1* after T0 leaf sample collection for DNA analysis. Line T315 6.1 is a putative knock-out in *OsOSD1* only, which is known to be fertile<sup>1</sup>.

**Supplementary Table 4. Detail of distribution of ploidy level among T2 progenies.**

| T0 event         | T-DNA copy | T1 plant     | 2n  | 4n | % Diploids | Reminder %<br>diploids in<br>T1s |
|------------------|------------|--------------|-----|----|------------|----------------------------------|
| <b>T314 15.1</b> | >2         | T314 15.1/4  | 45  | 2  | 96         | 98                               |
|                  |            | T314 15.1/6  | 40  | 1  | 98         |                                  |
|                  |            | T314 15.1/8  | 40  | 0  | 100        |                                  |
|                  |            | T314 15.1/10 | 40  | 2  | 95         |                                  |
|                  |            | T314 15.1/11 | 45  | 2  | 96         |                                  |
|                  |            |              | 210 | 7  | 96.8       |                                  |
| <b>T314 37.7</b> | 2          | T314 37.7/11 | 42  | 6  | 87         | 92                               |
|                  |            | T314 37.7/14 | 41  | 10 | 80         |                                  |
|                  |            | T314 37.7/15 | 40  | 2  | 95         |                                  |
|                  |            | T314 37.7/19 | 37  | 4  | 90         |                                  |
|                  |            | T314 37.7/20 | 44  | 2  | 96         |                                  |
|                  |            |              | 204 | 24 | 89.5       |                                  |
| <b>T315 3.2</b>  | 1          | T315 3.2/485 | 38  | 6  | 86         | 96                               |
|                  |            | T315 3.2/492 | 40  | 4  | 91         |                                  |
|                  |            | T315 3.2/501 | 40  | 4  | 91         |                                  |
|                  |            | T315 3.2/503 | 44  | 0  | 100        |                                  |
|                  |            | T315 3.2/504 | 43  | 1  | 99         |                                  |
|                  |            |              | 205 | 15 | 93.2       |                                  |
| <b>T315 5.4</b>  | 1          | T315 5.4/409 | 47  | 1  | 98         | 93                               |
|                  |            | T315 5.4/411 | 43  | 1  | 98         |                                  |
|                  |            | T315 5.4/412 | 41  | 3  | 93         |                                  |
|                  |            | T315 5.4/414 | 60  | 6  | 91         |                                  |
|                  |            | T315 5.4/417 | 44  | 2  | 96         |                                  |
|                  |            |              | 235 | 13 | 94.8       |                                  |
| <b>T315 8.1</b>  | 1          | T315 8.1/292 | 40  | 0  | 100        | 95                               |
|                  |            | T315 8.1/313 | 51  | 5  | 91         |                                  |
|                  |            | T315 8.1/318 | 39  | 1  | 97         |                                  |
|                  |            | T315 8.1/322 | 38  | 2  | 95         |                                  |
|                  |            | T315 8.1/329 | 33  | 7  | 82         |                                  |
|                  |            |              | 201 | 15 | 93.1       |                                  |
| <b>T315 8.2</b>  | 1          | T315 8.2/207 | 50  | 10 | 83         | 97                               |
|                  |            | T315 8.2/211 | 39  | 7  | 84         |                                  |
|                  |            | T315 8.2/212 | 54  | 10 | 84         |                                  |
|                  |            | T315 8.2/234 | 56  | 3  | 95         |                                  |
|                  |            | T315 8.2/350 | 40  | 4  | 91         |                                  |
|                  |            |              | 239 | 34 | 87.5       |                                  |

Each T1 progeny is formed by five T1 plants of the T314 (sgMiMe\_pAtECS:BBM1) 15.1 and 37.7 events, and of the T315 (sgMiMe\_pOsECS:BBM1) 3.2, 5.4, 8.1 and 8.2 events. Frequency of diploid plants at the T1 generation is provided for reference.

**Supplementary Table 5. Detail of distribution of ploidy level among T3 progenies.**

|                    | 2n | 4n | % diploids |
|--------------------|----|----|------------|
| T314 15.1 / 11 / 7 | 98 | 2  | 98         |
| T314 15.1 / 6 / 10 | 99 | 1  | 99         |
| T314 15.1 / 8 / 7  | 99 | 1  | 99         |
|                    |    |    | 98.7       |
| T314 37.7 / 19 / 4 | 93 | 7  | 93         |
| T314 37.7 / 20 / 2 | 92 | 8  | 92         |
| T314 37.7 / 11 / 6 | 96 | 4  | 96         |
|                    |    |    | 93.7       |

|                     |    |   |      |
|---------------------|----|---|------|
| T315 8.1 / 181 / 4  | 94 | 6 | 94   |
| T315 8.1 / 182 / 10 | 92 | 8 | 92   |
| T315 8.1 / 186 / 3  | 92 | 8 | 92   |
|                     |    |   | 92.7 |
| T315 5.4 / 66 / 10  | 96 | 4 | 96   |
| T315 5.4 / 70 / 4   | 98 | 2 | 98   |
| T315 5.4 / 67 / 7   | 96 | 4 | 96   |
|                     |    |   | 96.7 |

One hundred T3 progeny plants of each of three randomly selected T2 plants of T314 (sgMiMe\_pAtECS:BBM1) 15.1 and 37.7 events, and T315 (sgMiMe\_pOsECS:BBM1) 5.4 and 8.1 events have been analyzed

**Supplementary Table 6. Analysis of fertile Kitaake primary (T0) transgenics harboring either the *sgMiMe\_pAtECS:BBM1* (T314) T-DNA or the *sgMiMe\_pOsECS:BBM1* (T315) T-DNA.**

**A.**

| T0 Events                |     | <i>OSD1</i> gRNA1                             | <i>OSD1</i> gRNA2                      | <i>PAIR1</i>                         | <i>REC8</i>                          |
|--------------------------|-----|-----------------------------------------------|----------------------------------------|--------------------------------------|--------------------------------------|
|                          |     | AAGT <b>GAGAAATTCGGCG</b><br><b>G</b> TAGGGCG | CGGCGCTCGCCGACCCCT<br><b>C</b> GGGTGGT | CCTCGACGACAACCTCCTC<br><b>A</b> CCCT | TGGTGTGGCGATCGTGT<br><b>A</b> CGAGAG |
| T314:sgMiMe-pAtECS:BBM1  | #3a | WT                                            | Biallelic (-2/+2)                      | Biallelic (-2/+1)                    | Biallelic (-13/-14)                  |
|                          | #33 | Heterozygous (-3)                             | Biallelic (-2/+1)                      | Homozygous (+A)                      | Biallelic (-2/-2)                    |
| T315:sgMiMe-pBOsECS:BBM1 | #9a | WT                                            | Biallelic (+2/+1)                      | Biallelic (-1/+1)                    | Homozygous (-5)                      |
|                          | 27d | WT                                            | Homozygous (+T)                        | Biallelic (-1/+1, 1bp substitution)  | Biallelic (-4/-5)                    |

**B.**

| Line #            | # T1 Progeny     | Diploids | Tetraploids | Apomictic/<br>diploid progeny (%) | Panicle fertility<br>(from master tillers of 5 T1 plants) |
|-------------------|------------------|----------|-------------|-----------------------------------|-----------------------------------------------------------|
| Wild-type control |                  |          |             |                                   | 89.7 %                                                    |
| 3A                | 69<br>(6 twins)  | 38       | 31          | 55                                | 81.5 %                                                    |
| 33                | 61<br>(10 twins) | 51       | 10          | 84                                | 74.1%                                                     |

**C.**

| Line # | # T1 Progeny    | Diploids | Tetraploids | Apomictic/<br>diploid progeny %age | Panicle fertility<br>(from master tillers of 5 T1 plants) |
|--------|-----------------|----------|-------------|------------------------------------|-----------------------------------------------------------|
| 9A     | 55<br>(1 twin)  | 3        | 52          | 5                                  | 82.0 %                                                    |
| 27D    | 58<br>(6 twins) | 49       | 9           | 84                                 | 59.1%                                                     |

**A.** Mutations at the *CRISPR*-Cas9 target sites in *OSD1*, *PAIR1* and *REC8* genes. All the lines analyzed were confirmed to be frame shift loss-of-function mutations for all the alleles of the three *MiMe* genes. Line #33 for *sgMiMe\_pAtECS:BBM1* construct was the only line analyzed in which *OSD1* had a 3 bp deletion in one of the alleles at gRNA1 site. The same alleles had 1 bp insertion at the gRNA2 site. Protospacer sequences are in red. **B-C.** Fertility and apomixis efficiency in transgenic Kitaake plants generated using the *sgMiMe\_pAtECS:BBM1* (T314) (**A**) and *sgMiMe\_pOsECS:BBM1* (T315) (**B**) T-DNA vectors.

**Supplementary Table 7 . Detail of traits scored in T2 progeny plants of five T1 plants.**

| T0 Event/T1 plant  | T2/F1 plant number | Plant height | Number of tillers | n-1 Leaf length | n-1 Leaf width | Flag leaf length | Flag leaf width | Main panicle length |
|--------------------|--------------------|--------------|-------------------|-----------------|----------------|------------------|-----------------|---------------------|
| T314 15.1/4        | 8                  | 84.3 a       | 12.9 a            | 47.8 a          | 1.4 a          | 27.1 a           | 1.6 a           | 24.4 a              |
| T314 15.1/6        | 8                  | 83.9 a       | 14.1 a            | 49.9 a          | 1.5 a          | 28.1 a           | 1.6 a           | 24.3 a              |
| T314 15.1/8        | 6                  | 83.8 a       | 15.5 a            | 54.3 a          | 1.1 a          | 27.7 a           | 1.4 a           | 25.4 a              |
| T314 15.1/10       | 5                  | 81.0 a       | 13.4 a            | 42.9 a          | 1.5 a          | 31.6 a           | 1.7 a           | 24.1 a              |
| T314 15.1/11       | 9                  | 80.6 a       | 16.0 a            | 47.1 a          | 1.3 a          | 27.3 a           | 1.5 a           | 23.8 a              |
| T314 15.1 mean     |                    | 82.5         | 14.5              | 47.3            | 1.4            | 28.3             | 1.6             | 24.2                |
|                    |                    |              |                   |                 |                |                  |                 |                     |
| T314 37.7/11       | 7                  | 85.7 a       | 15.4 a            | 45.5 a          | 1.4 a          | 26.0 a           | 1.5 a           | 23.9 a              |
| T314 37.7/14       | 8                  | 85.4 a       | 16.3 a            | 45.4 a          | 1.4 a          | 27.6 a           | 1.5 a           | 23.3 a              |
| T314 37.7/15       | 8                  | 85.0 a       | 14.1 a            | 49.2 a          | 1.4 a          | 28.9 a           | 1.5 a           | 23.8 a              |
| T314 37.7/19       | 8                  | 82.9 a       | 15.9 a            | 45.9 a          | 1.3 a          | 26.2 a           | 1.5 a           | 23.6 a              |
| T314 37.7/20       | 9                  | 85.9 a       | 14.2 a            | 44.3 a          | 1.4 a          | 25.7 a           | 1.4 a           | 23.6 a              |
| T314 37.7 mean     |                    | 85.0         | 15.2              | 46.0            | 1.4            | 26.9             | 1.5             | 23.6                |
|                    |                    |              |                   |                 |                |                  |                 |                     |
| T315 5.4/63        | 7                  | 85.0 a       | 15.4 a            | 45.4 a          | 1.5 a          | 25.9 a           | 1.5 a           | 24.4 a              |
| T315 5.4/66        | 5                  | 87.4 a       | 12.6 a            | 45.6 a          | 1.5 a          | 26.4 a           | 1.6 a           | 24.5 a              |
| T315 5.4/67        | 10                 | 89.1 a       | 13.8 a            | 43.9 a          | 1.5 a          | 23.8 a           | 1.6 a           | 24.6 a              |
| T315 5.4/70        | 8                  | 87.3 a       | 14.3 a            | 48.1 a          | 1.7 a          | 27.1 a           | 1.7 a           | 24.6 a              |
| T315 5.4/86        | 8                  | 88.0 a       | 14.6 a            | 49.1 a          | 1.6 a          | 26.9 a           | 1.8 a           | 25.3 a              |
| T315 5.4 mean      |                    | 87.3         | 14.4              | 46.5            | 1.6            | 26.0             | 1.6             | 24.6                |
|                    |                    |              |                   |                 |                |                  |                 |                     |
| T315 8.1/181       | 8                  | 83.4 a       | 14.0 a            | 48.4 a          | 1.4 a          | 27.8 a           | 1.6 a           | 24.8 a              |
| T315 8.1/182       | 8                  | 82.1 a       | 13.9 a            | 47.0 a          | 1.5 a          | 27.5 a           | 1.6 a           | 24.4 a              |
| T315 8.1/186       | 5                  | 81.5 a       | 14.2 a            | 51.1 a          | 1.6 a          | 29.6 a           | 1.7 a           | 26.1 a              |
| T315 8.1/188       | 5                  | 86.8 a       | 13.4 a            | 48.0 a          | 1.4 a          | 28.0 a           | 1.6 a           | 26.2 a              |
| T315 8.1/189       | 8                  | 83.3 a       | 13.5 a            | 48.3 a          | 1.5 a          | 30.2 a           | 1.6 a           | 26.1 a              |
| T315 8.1 mean      |                    | 83.2         | 13.9              | 48.5            | 1.5            | 28.6             | 1.6             | 25.3                |
|                    |                    |              |                   |                 |                |                  |                 |                     |
| BRS-CIRAD 302 mean | 15                 | 84.8         | 13.4              | 50.1            | 1.3            | 31.9             | 1.6             | 24.5                |

T2 progenies of T314 (sgMiMe\_pAtECS:BBM1) 15.1 and 37.7 events and T315 (sgMiMe\_pOsECS:BBM1) 5.4 and 8.1 events have been evaluated. Variation across the five T2 progenies of each event was individually examined for statistical significance using a Kruskal-Wallis test. Numbers followed by the same letter are not statistically different at the  $\alpha$ -risk of 0.05.



**Supplementary Table 8. Pollen viability estimated using Alexander's staining method in BRS-CIRAD 302 F1 hybrid plants and T2 progeny plants of 4 apomictic events.**

| Material      | Plants | Average pollen viability | SD  |
|---------------|--------|--------------------------|-----|
| BRS-CIRAD 302 | 4      | 59.1                     | 7.0 |
| T2 T314 15.1  | 4      | 85.9                     | 2.3 |
| T2 T314 37.7  | 6      | 95.3                     | 1.7 |
| T2 T315 5.4   | 5      | 95.2                     | 1.7 |
| T2 T315 8.1   | 4      | 94.6                     | 1.9 |

BRS-CIRAD 302 control plants and T2 plants of T314 (sgMiMe\_pAtECS:BBM1) 15.1 and 37.7 events and T315 (sgMiMe\_pOsECS:BBM1) 5.4 and 8.1 events were grown under the same controlled greenhouse conditions and flowered synchronously. At least four distinct plants were used and frequency was established by counting at least 1,500 pollen grains released from the anthers of two distinct flowers per plant.

**Supplementary Table 9. Seed shape traits of dehulled mature seeds collected on BRS-CIRAD 302 F1 hybrid (F2 seeds), BRS-CIRAD 302 parental lines (1F and D24) and T2 plants of 4 apomictic lines (T3 seeds).**

|                       | length<br>(mm) | width<br>(mm) | volume<br>(mm <sup>3</sup> ) | shape  |
|-----------------------|----------------|---------------|------------------------------|--------|
| 1F                    | 6.88           | 2.11          | 10.18                        | 3.26   |
| D24                   | 7.32           | 2.01          | 9.79                         | 3.66   |
| BRS-CIRAD 302         | 7.17           | 2.19          | 11.36                        | 3.28   |
| F2 seeds              | 7.18 a,b       | 2.11 a        | 10.58 a,b                    | 3.42 a |
| T314 15.1             | 7.15 a,b       | 2.05 a,b      | 9.97 a,b                     | 3.50 a |
| T314 37.7             | 6.95 b         | 2.02 b        | 9.39 b                       | 3.45 a |
| T315 5.4              | 7.37 a         | 2.12 a        | 10.97 a                      | 3.48 a |
| T315 8.1              | 7.33 a         | 2.08 a,b      | 10.46 a,b                    | 3.54 a |
| Average<br>apomictics | 7.18           | 2.06          | 10.13                        | 3.49   |

Seed shape traits of BRS-CIRAD 302 commercial F1 seeds are shown for comparison. Numbers followed by the same letter are not significantly different from each other in a Kruskal-Wallis test ( $\alpha$ -risk : 0.05). Source data are provided as a Source Data file.

**Supplementary Table 10. Target sequences in *OsOSD1*, *PAIR1* and *OsREC8* genes.**

| sgRNA          | 5' - 3' target sequence ( <b>PAM</b> ) |
|----------------|----------------------------------------|
| sgRNA OsOSD1/1 | GAGAAATTCCGGCGGTAGGG <b>CGG</b>        |
| sgRNA OsOSD1/2 | GCGCTCGCCGACCCCTCGGG <b>TGG</b>        |
| sgRNA PAIR1    | GGTGAGGAGGTTGTCGTCGA <b>GGG</b>        |
| sgRNA OsREC8   | GTGTGGCGATCGTGTACGAG <b>AGG</b>        |

**Supplementary Table 11. list of primers used for the molecular characterization of transformants and SSR genotyping.**

| <b>Primer</b>                  | <b>5'-3' Primer sequence</b>                            | <b>Comments</b>                                            |
|--------------------------------|---------------------------------------------------------|------------------------------------------------------------|
| REG1-F<br>REG1-R               | ATGGAATGATGGATGAATGTTTCAC<br>ATGGAATGATGGATGAATGTTTCAC  | Amplification of OsECA1 promoter region                    |
| OsOSD1-F<br>OsOSD1-R           | TTACTTGGAAGAGGCAGGAGCC<br>ACCTTGACGACTGACGTGATGTC       | Amplification of sgOsOSD1 target site                      |
| PAIR1-F<br>PAIR1-R             | GTGGTGTGGTGTGTTTCAGGAG<br>TGGAATCCCCAATCAGTAAGGCAC      | Amplification of sgPAIR1 target site                       |
| OsREC8-F<br>OsREC8-R           | GCACTAAGGCTCTCCGGAATTCTC<br>AATGGATCAAGGAGGAGGCACC      | Amplification of sgOsREC8 target site                      |
| pEC1.2:BBM1-F<br>pEC1.2:BBM1-R | TTCCCTTTCCACACGCTAC<br>AGAAGGAGGAGGAGGAGAAGC            | Ascertaining presence of the pEC1.2:BBM1 cassette          |
| pECA1:BBM1-F<br>pECA1:BBM1-R   | ACCGTCAATCCTTTCCATTCTC<br>GAAGTCCTCCAGCTTCGGC           | Ascertaining presence of the pECA1:BBM1 cassette           |
| Cas9-F<br>Cas9-R               | TGCCTGCGGAGGATAGCATGAAGCTC<br>TACCACGAGAAGTACCCGACCATCT | Ascertaining presence of Cas9                              |
| HPT-F<br>HPT-R                 | CTGAACTCACCGCGACGTCTG<br>GGCGTCGGTTTCCACTATCG           | Determination of T-DNA copy number integrated in T0 plants |
| RM1-F<br>RM1-R                 | GCGAAAACACAATGCAAAAA<br>GCGTTGGTTGGACCTGAC              | Amplification of SSR locus RM1 located on chr 1            |
| RM25-F<br>RM25-R               | GGAAAGAATGATCTTTTCATGG<br>CTACCATCAAAACCAATGTTC         | Amplification of SSR locus RM25 located on chr 8           |
| RM215-F<br>RM215-R             | CAAAATGGAGCAGCAAGAGC<br>TGAGCACCTCCTTCTCTGTAG           | Amplification of SSR locus RM215 located on chr 9          |
| RM287-F<br>RM287-R             | TTCCCTGTTAAGAGAGAAATC<br>GTGTATTTGGTGAAAGCAAC           | Amplification of SSR locus RM287 located on chr 11         |

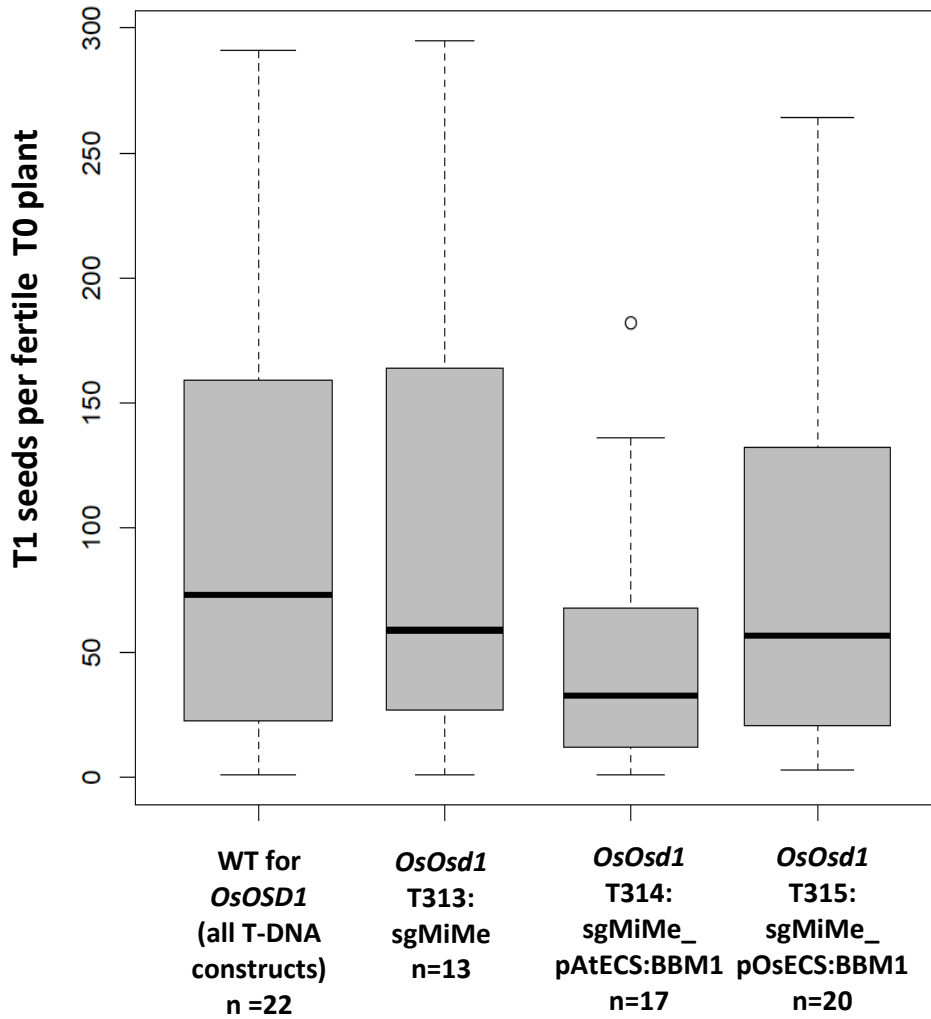

**Supplementary Figure 1. Distribution of the number of seeds harvested on fertile T0 plants.** From left to right: transformed but unedited for *OsOSD1* (pooled T313, T314, and T315 events); harboring the T313 sgMiMe T-DNA and edited for *OsOSD1*; harboring the T314 sgMiMe-pAtECS:BBM1 T-DNA and edited for *OsOSD1*; and harboring the T314 sgMiMe-pOsECS:BBM1 T-DNA and edited for *OsOSD1*. The line dividing the box is the median whereas the box represents the middle 50% of the group and the upper and lower edges of the box represents third and first quartile limits respectively. Upper and lower whiskers represent scores outside the middle 50%. Outliers position outside whiskers

|               | RM1      |          | RM25     |          | RM215    |          | RM287    |          |
|---------------|----------|----------|----------|----------|----------|----------|----------|----------|
|               | Allele 1 | Allele 2 | Allele 1 | Allele 2 | Allele 1 | Allele 2 | Allele 1 | Allele 2 |
| 1F parent     | 119      | 119      | 162      | 162      | 167      | 167      | 134      | 134      |
| 1F parent     | 119      | 119      | 162      | 162      | 167      | 167      | 134      | 134      |
| D24 parent    | 125      | 125      | 164      | 164      | 163      | 163      | 132      | 132      |
| D24 parent    | 125      | 125      | 164      | 164      | 163      | 163      | 132      | 132      |
| BRS-CIRAD 302 | 119      | 125      | 162      | 164      | 163      | 167      | 132      | 134      |
| BRS-CIRAD 302 | 119      | 125      | 162      | 164      | 163      | 167      | 132      | 134      |
| BRS-CIRAD 302 | 119      | 125      | 162      | 164      | 163      | 167      | 132      | 134      |
| F2 progeny 1  | 119      | 125      | 162      | 164      | 163      | 167      | 132      | 134      |
| F2 progeny 2  | 119      | 125      | 162      | 164      | 163      | 167      | 132      | 134      |
| F2 progeny 3  | 119      | 125      | 162      | 164      | 163      | 163      | 132      | 134      |
| F2 progeny 4  | 119      | 119      | 162      | 164      | 163      | 167      | 134      | 134      |
| F2 progeny 5  | 119      | 125      | 162      | 164      | 163      | 167      | 134      | 134      |
| F2 progeny 6  | 119      | 119      | 162      | 164      | 163      | 167      | 134      | 134      |
| F2 progeny 7  | 125      | 125      | 164      | 164      | 163      | 163      | 134      | 134      |
| F2 progeny 8  | 119      | 125      | 164      | 164      | 167      | 167      | 134      | 134      |
| F2 progeny 9  | 119      | 125      | 164      | 164      | 163      | 167      | 134      | 134      |
| F2 progeny 10 | 119      | 125      | 162      | 162      | 167      | 167      | 132      | 132      |
| F2 progeny 11 | 119      | 119      | 162      | 162      | 167      | 167      | 134      | 134      |
| F2 progeny 12 | 119      | 125      | 164      | 164      | 163      | 163      | 132      | 132      |

|              |     |     |     |     |     |     |     |     |
|--------------|-----|-----|-----|-----|-----|-----|-----|-----|
| T313 12.1.1  | 119 | 125 | 162 | 164 | 163 | 167 | 132 | 134 |
| T313 12.1.2  | 119 | 125 | 162 | 164 | 163 | 167 | 132 | 134 |
| T313 12.1.3  | 119 | 125 | 162 | 164 | 163 | 167 | 132 | 134 |
| T313 12.1.4  | 119 | 125 | 162 | 164 | 163 | 167 | 132 | 134 |
| T313 12.1.5  | 119 | 125 | 162 | 164 | 163 | 167 | 132 | 134 |
| T313 12.1.6  | 119 | 125 | 162 | 164 | 163 | 167 | 132 | 134 |
| T313 12.1.7  | 119 | 125 | 162 | 164 | 163 | 167 | 132 | 134 |
| T313 12.1.8  | 119 | 125 | 162 | 164 | 163 | 167 | 132 | 134 |
| T313 12.1.9  | 119 | 125 | 162 | 164 | 163 | 167 | 132 | 134 |
| T313 12.1.10 | 119 | 125 | 162 | 164 | 163 | 167 | 132 | 134 |
| T313 21.1    | 119 | 125 | 162 | 164 | 163 | 167 | 132 | 134 |
| T313 21.2    | 119 | 125 | 162 | 164 | 163 | 167 | 132 | 134 |
| T313 21.3    | 119 | 125 | 162 | 164 | 163 | 167 | 132 | 134 |
| T313 21.4    | 119 | 125 | 162 | 164 | 163 | 167 | 132 | 134 |
| T313 21.5    | 119 | 125 | 162 | 164 | 163 | 167 | 132 | 134 |
| T313 21.6    | 119 | 125 | 162 | 164 | 163 | 167 | 132 | 134 |
| T313 21.7    | 119 | 125 | 162 | 164 | 163 | 167 | 132 | 134 |
| T313 21.8    | 119 | 125 | 162 | 164 | 163 | 167 | 132 | 134 |
| T313 21.9    | 119 | 125 | 162 | 164 | 163 | 167 | 132 | 134 |
| T313 21.10   | 119 | 125 | 162 | 164 | 163 | 167 | 132 | 134 |

|              |     |     |     |     |     |     |     |     |
|--------------|-----|-----|-----|-----|-----|-----|-----|-----|
| T314.15.1.1  | 119 | 125 | 162 | 164 | 163 | 167 | 132 | 134 |
| T314.15.1.2  | 119 | 125 | 162 | 164 | 163 | 167 | 132 | 134 |
| T314.15.1.3  | 119 | 125 | 162 | 164 | 163 | 167 | 132 | 134 |
| T314.15.1.4  | 119 | 125 | 162 | 164 | 163 | 167 | 132 | 134 |
| T314.15.1.5  | 119 | 125 | 162 | 164 | 163 | 167 | 132 | 134 |
| T314.15.1.6  | 119 | 125 | 162 | 164 | 163 | 167 | 132 | 134 |
| T314.15.1.7  | 119 | 125 | 162 | 164 | 163 | 167 | 132 | 134 |
| T314.15.1.8  | 119 | 125 | 162 | 164 | 163 | 167 | 132 | 134 |
| T314.15.1.9  | 119 | 125 | 162 | 164 | 163 | 167 | 132 | 134 |
| T314.15.1.10 | 119 | 125 | 162 | 164 | 163 | 167 | 132 | 134 |
| T314.15.1.11 | 119 | 125 | 162 | 164 | 163 | 167 | 132 | 134 |
| T314.15.1.12 | 119 | 125 | 162 | 164 | 163 | 167 | 132 | 134 |
| T314.15.1.13 | 119 | 125 | 162 | 164 | 163 | 167 | 132 | 134 |
| T314.15.1.14 | 119 | 125 | 162 | 164 | 163 | 167 | 132 | 134 |
| T314.15.1.15 | 119 | 125 | 162 | 164 | 163 | 167 | 132 | 134 |
| T314.15.1.16 | 119 | 125 | 162 | 164 | 163 | 167 | 132 | 134 |
| T314.15.1.17 | 119 | 125 | 162 | 164 | 163 | 167 | 132 | 134 |
| T314.15.1.18 | 119 | 125 | 162 | 164 | 163 | 167 | 132 | 134 |
| T314.15.1.19 | 119 | 125 | 162 | 164 | 163 | 167 | 132 | 134 |
| T314.15.1.20 | 119 | 125 | 162 | 164 | 163 | 167 | 132 | 134 |
| T314.15.1.21 | 119 | 125 | 162 | 164 | 163 | 167 | 132 | 134 |
| T314.15.1.22 | 119 | 125 | 162 | 164 | 163 | 167 | 132 | 134 |
| T314.15.1.23 | 119 | 125 | 162 | 164 | 163 | 167 | 132 | 134 |
| T314.15.1.24 | 119 | 125 | 162 | 164 | 163 | 167 | 132 | 134 |
| T314.15.1.25 | 119 | 125 | 162 | 164 | 163 | 167 | 132 | 134 |
| T314.15.1.26 | 119 | 125 | 162 | 164 | 163 | 167 | 132 | 134 |
| T314.15.1.27 | 119 | 125 | 162 | 164 | 163 | 167 | 132 | 134 |
| T314.15.1.28 | 119 | 125 | 162 | 164 | 163 | 167 | 132 | 134 |
| T314.15.1.29 | 119 | 125 | 162 | 164 | 163 | 167 | 132 | 134 |
| T314.15.1.30 | 119 | 125 | 162 | 164 | 163 | 167 | 132 | 134 |
| T314.15.1.31 | 119 | 125 | 162 | 164 | 163 | 167 | 132 | 134 |
| T314.15.1.32 | 119 | 125 | 162 | 164 | 163 | 167 | 132 | 134 |

[illegible]

**Supplementary Figure 2. Genotypes of T1 and T2 progenies along with BRS-CIRAD 302 parental lines, BRS-CIRAD 302 F1 hybrid and sexual F2 progenies.**

Four microsatellites (SSR) loci (RM1; RM25; RM215; RM287) were used for genotyping. **A.** Homozygous genotype of the 1F and D24 parents and heterozygous genotype of the BRS-CIRAD 302 hybrid. Twelve F2 progenies showing free segregation of parental alleles. **B.** Representative T1 progenies (n=10) of two T0 T313 sgMiMe plants (events 12.1 and 21) exhibiting no marker segregation. **C.** Representative T314 sgMiMe\_pAtECS:BBM1 T1 progeny (event 15.1) (n=32) exhibiting no marker segregation. **D.** Representative T315 sgMiMe\_pOsECS:BBM1 T2 progeny plants (event 5.4) exhibiting no marker segregation.

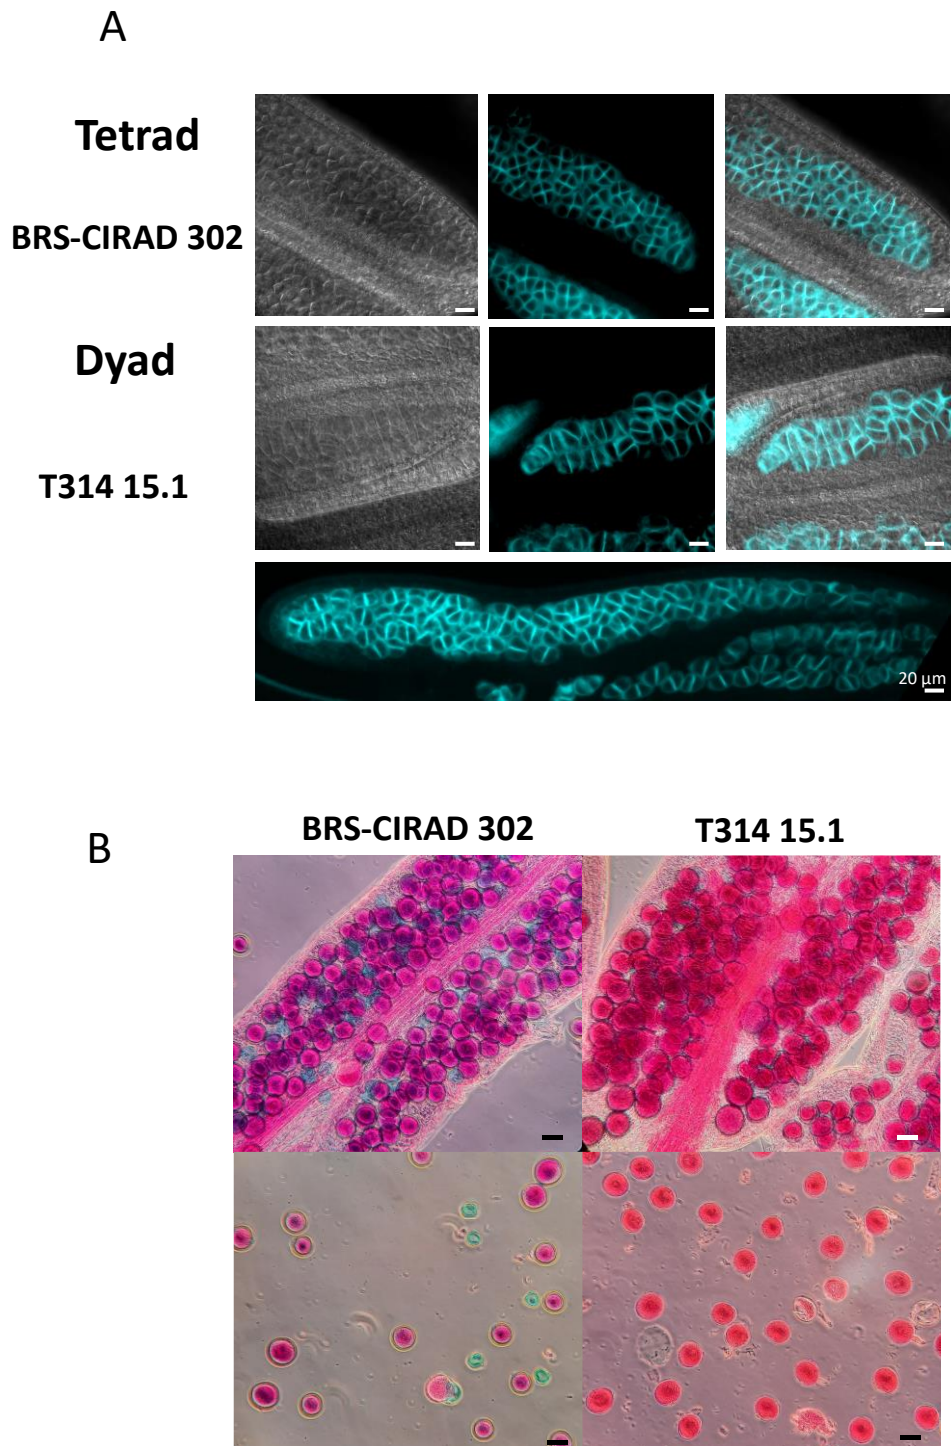

**Supplementary Figure 3. Outcome of male meiosis and gametogenesis in apomictic lines.**  
**A.** Anthers containing tetrads and dyads in BRS CIRAD 302 and T314 15.1 events, respectively. Representative images of callose deposition patterns detected by aniline blue staining (cyan signal, central panel). Similar results were obtained in at least 2 independent plants. Scale bars: 20 µm **B.** Pollen stained with Alexander's solution in representative mature anthers left: BRS-CIRAD 302; right: representative apomictic line (bar=40 µm).



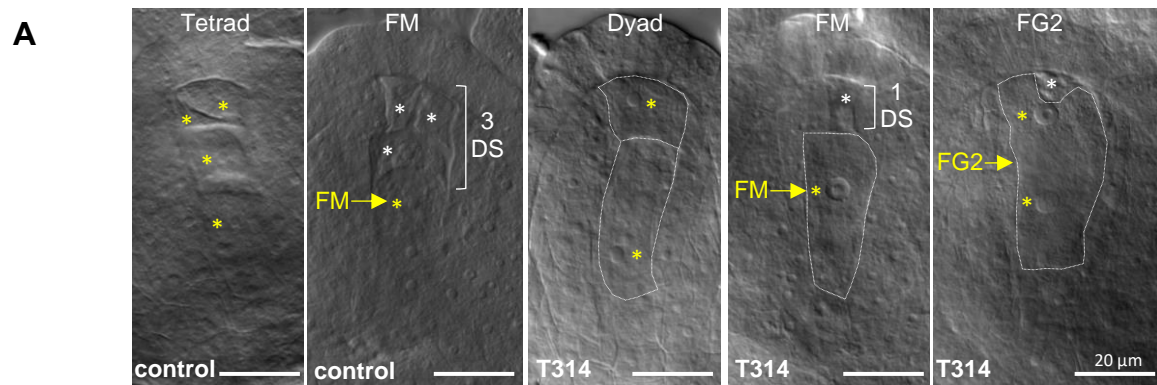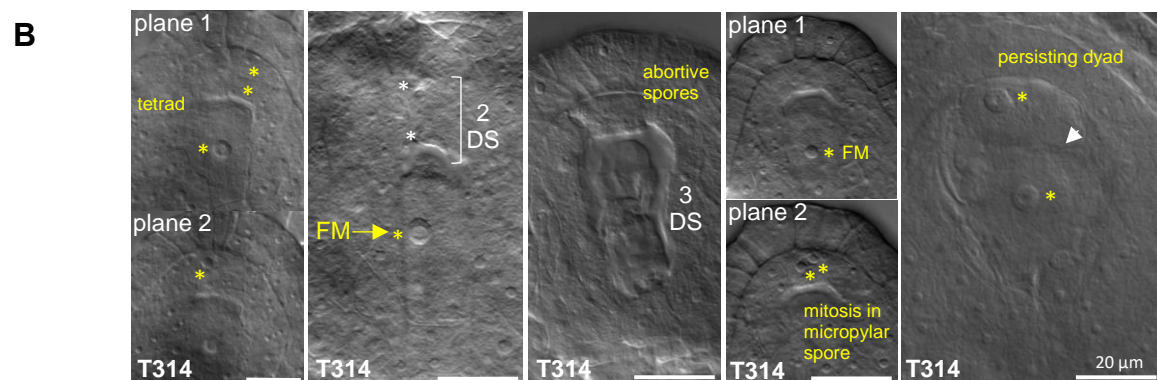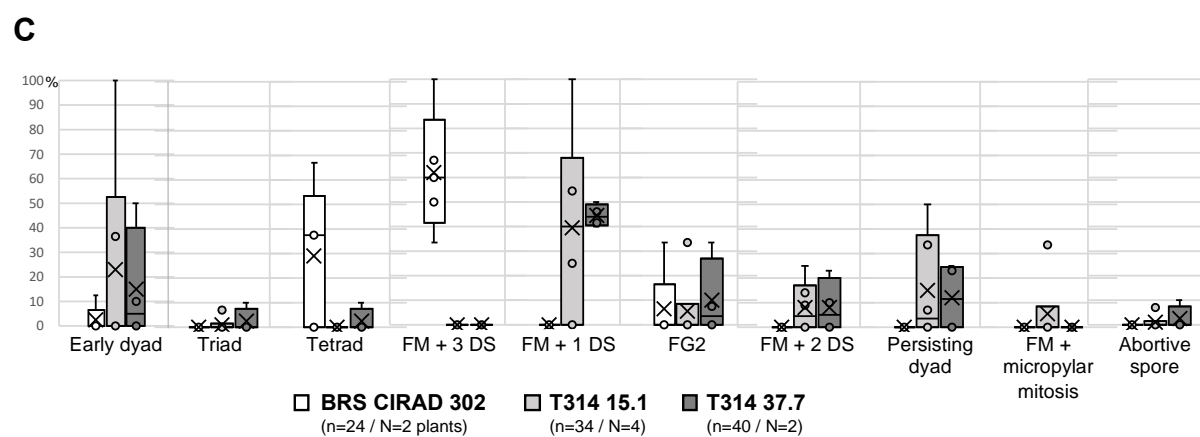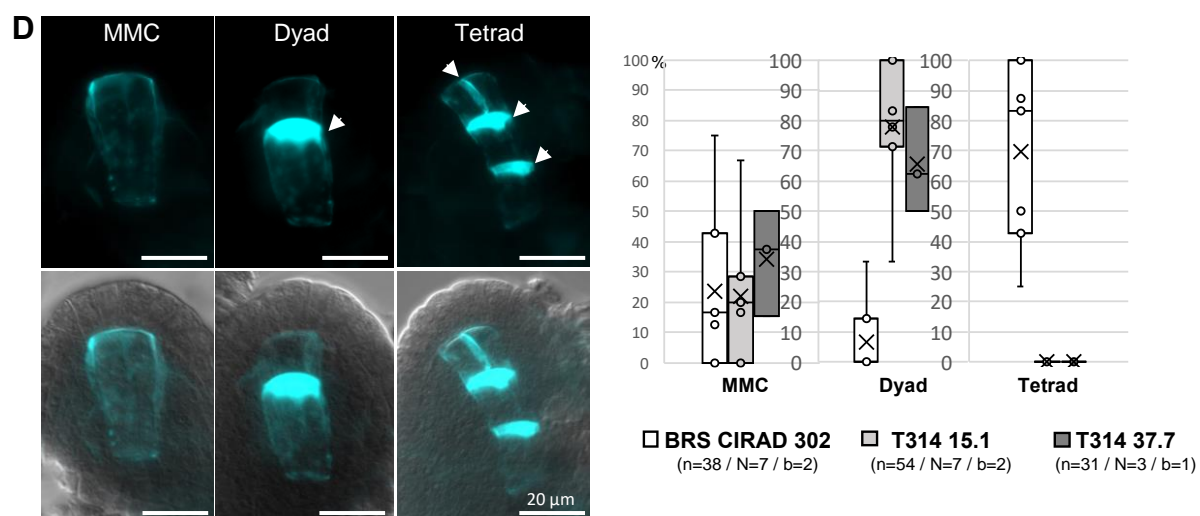

**Supplementary Figure 4. Cytological analysis of meiotic and post-meiotic ovules in apomictic lines.**

**A.** Representative images of clearing preparations of the major phenotypes observed in control BRS-CIRAD 302 and T314 ovules. Degenerated cells are marked by white asterisks; while functional cells, as assessed by prominent nucleoli and turgescence, are marked by yellow asterisks and dashed lined contours. Scale bars: 20  $\mu$ m. **B.** Minor phenotypes observed in T314 plants. Symbols as in A. Scale bars: 20  $\mu$ m. **C.** Quantification of major and minor phenotypes frequencies in BRS-CIRAD 302, T314 15.1, and T314 37.7 samples. Box plots limits represent 2nd and 3rd quartiles, whiskers indicate 1st and 4th quartiles, black line within the box marks the median, cross within the box marks the mean, circles indicate internal and outliers data points. Statistics were derived for (n) ovules, from (N) independent plants - numbers are indicated in chart legend. **D.** Representative images of callose deposition patterns (arrows) detected by aniline blue staining (cyan signal, upper panel) in ovules at MMC, dyad, and tetrad stages. Overlay with cleared tissue is shown in the bottom panel. Scale bars: 20  $\mu$ m. Box plots (with same elements as described in C.) quantify frequencies of ovules displaying MMC, dyad, or tetrad callose patterns in control plants BRS-CIRAD 302, or T314 15.1, and T314 37.7 plants. Statistics were derived for (n) ovules, from (N) independent plants, from (b) independent batches - numbers are indicated in chart legend.

Abbreviations: FM: functional megaspore; FG2: female gametophyte at 2 nuclei stage; DS: degenerated spore(s); MMC: megaspore mother cell. Scale bars: 20  $\mu$ m.

Source data is provided as a Source Data file.

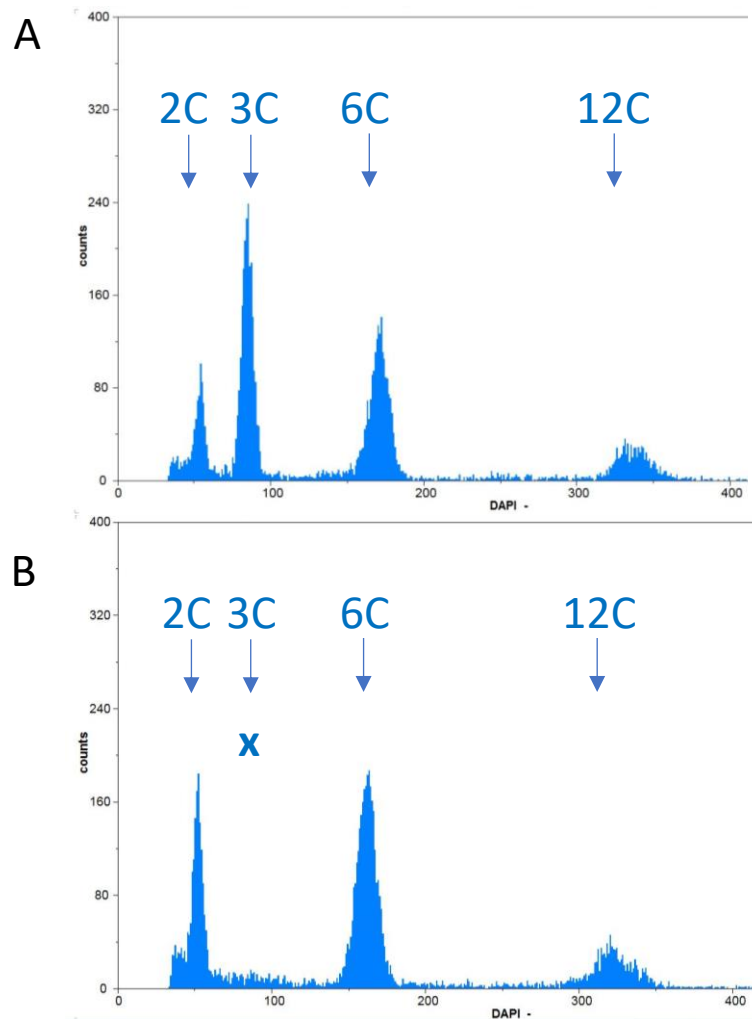

**Supplementary Figure 5. Flow cytometry histograms of DAPI-stained nuclei of cells of developing sexual and apomictic endosperms. A.** control BRS-CIRAD 302 plants; **B.** apomictic plants. Contaminating, nucellar/tegument/pericarp diploid nuclei released with the milky starch endosperm form a 2C peak, providing an internal control in the preparation.

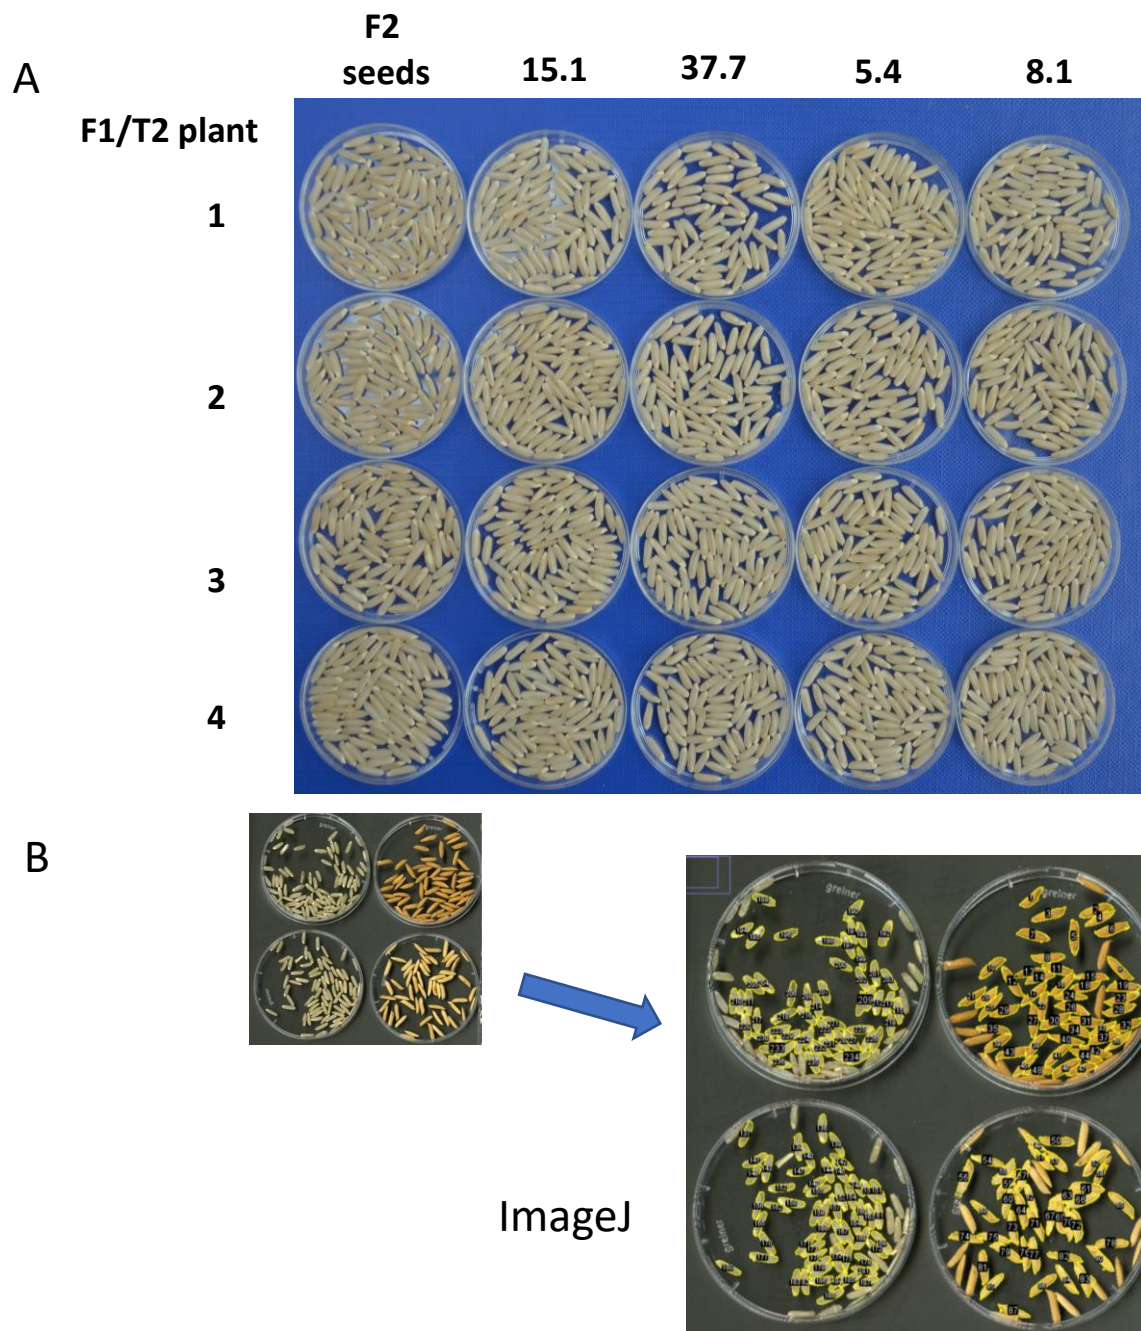

**Supplementary Figure 6. Shape of the dehulled mature seeds collected on F1 hybrid and T2 apomictic lines.**

**A.** Dehulled T3 seeds harvested from four independent T2 plants of apomictic events 15.1, 37.7, 5.4, and 8.1 and of F1 BRS-CIRAD 302 used for analysis of seed format. **B.** Snapshot of ImageJ image treatment illustrating the thresholding and the definition of the area of interest for individually numbered kernels, for parental lines 1F (top) and D24 (bottom)

### Supplementary reference

<sup>1</sup> Mieulet, D. *et al.* Turning rice meiosis into mitosis. *Cell Research* **26**, 1242-1254 (2016)
